# Supplementary material for: A thorough mechanistic study of ethanol, acetaldehyde, and ethylene adsorption on Cu-MOR via DFT analysis
Source: Royal Society of Chemistry journal article supplement (doi:10.1039/d3cp05314h), 2023-12-18
Supplement: d3cp05314h1.pdf [file d3cp05314h1.pdf]

## **A Thoroughly Mechanistic Study of Ethanol, Acetaldehyde, and Ethylene Adsorption on Cu-MOR via DFT Analysis**

Yuli Ma<sup>a\*</sup>, Junyu Lang<sup>b\*</sup>

a. Institute of Marine Equipment, Shanghai Jiao Tong University, 800 Dongchuan Road, Shanghai 200240, China;

b. School of Physical Science and Technology, ShanghaiTech University, 393 Huaxia Middle Road, Shanghai 201210, China;

\* Corresponding author. E-mail:

mayuli@sjtu.edu.cn (Yuli Ma); langjy@shanghaitech.edu.cn (Junyu Lang)

**Table S1.** Geometric parameters of Cu<sub>3</sub>/MOR, Cu<sub>3</sub>O<sub>3</sub>/MOR and Cu<sub>6</sub>/MOR before and after adsorption.

|                                     | Before adsorption | CH <sub>3</sub> CH <sub>2</sub> OH adsorption | CH <sub>3</sub> CHO adsorption | CH <sub>2</sub> CH <sub>2</sub> adsorption |
|-------------------------------------|-------------------|-----------------------------------------------|--------------------------------|--------------------------------------------|
| Cu <sub>3</sub> /MOR                |                   |                                               |                                |                                            |
| d (Cu1-Cu2) (Å)                     | 2.338             | 2.337                                         | 2.326                          | 2.322                                      |
| d (Cu1-Cu3) (Å)                     | 2.262             | 2.319                                         | 2.382                          | 2.404                                      |
| d (Cu2-Cu3) (Å)                     | 2.322             | 2.260                                         | 2.314                          | 2.444                                      |
| d (Cu1-O1) (Å)                      | 2.042             | 2.048                                         | 1.991                          | 1.965                                      |
| d (Cu1-O2) (Å)                      | 2.439             | 2.461                                         | 2.631                          | 2.884                                      |
| d (Cu2-O3) (Å)                      | 2.047             | 2.048                                         | 2.054                          | 2.044                                      |
| d (Cu2-O4) (Å)                      | 2.079             | 2.091                                         | 2.128                          | 2.094                                      |
| d (Cu3-O5) (Å)                      | 2.052             | 2.056                                         | 2.319                          | 2.136                                      |
| d (Cu3-O6) (Å)                      | 2.105             | 2.140                                         | 2.287                          | 2.480                                      |
| Cu <sub>3</sub> O <sub>3</sub> /MOR |                   |                                               |                                |                                            |
| d (Cu1-O1) (Å)                      | 1.776             | 1.780                                         | 1.775                          | 1.793                                      |
| d (Cu1-O2) (Å)                      | 1.821             | 1.831                                         | 1.818                          | 1.978                                      |
| d (Cu2-O2) (Å)                      | 1.794             | 1.810                                         | 1.797                          | 1.981                                      |
| d (Cu2-O3) (Å)                      | 1.776             | 1.779                                         | 1.781                          | 1.959                                      |
| d (Cu3-O1) (Å)                      | 1.812             | 1.808                                         | 1.813                          | 1.817                                      |
| d (Cu3-O3) (Å)                      | 1.792             | 1.788                                         | 1.802                          | 1.903                                      |
| d (Cu1-O4) (Å)                      | 2.440             | 2.460                                         | 2.423                          | 2.752                                      |
| d (Cu1-O5) (Å)                      | 2.006             | 2.004                                         | 2.004                          | 2.004                                      |
| d (Cu2-O6) (Å)                      | 2.042             | 2.034                                         | 2.020                          | 2.115                                      |
| d (Cu2-O7) (Å)                      | 2.098             | 2.097                                         | 2.088                          | 2.097                                      |
| d (Cu3-O8) (Å)                      | 2.031             | 2.022                                         | 2.028                          | 2.069                                      |
| d (Cu3-O9) (Å)                      | 1.974             | 1.968                                         | 1.982                          | 2.007                                      |
| Cu <sub>6</sub> /MOR                |                   |                                               |                                |                                            |
| d (Cu1-Cu2) (Å)                     | 2.367             | 2.342                                         | 2.360                          | 2.356                                      |
| d (Cu1-Cu3) (Å)                     | 2.489             | 2.493                                         | 2.507                          | 2.488                                      |

|                 |       |       |       |       |
|-----------------|-------|-------|-------|-------|
| d (Cu2-Cu3) (Å) | 2.443 | 2.453 | 2.423 | 2.417 |
| d (Cu3-Cu4) (Å) | 2.434 | 2.370 | 2.369 | 2.376 |
| d (Cu4-Cu5) (Å) | 2.338 | 2.321 | 2.304 | 2.324 |
| d (Cu5-Cu6) (Å) | 2.375 | 2.375 | 2.403 | 2.414 |
| d (Cu4-Cu6) (Å) | 2.446 | 2.494 | 2.510 | 2.520 |
| d (Cu2-Cu6) (Å) | 2.479 | 2.429 | 2.501 | 2.547 |
| d (Cu3-Cu6) (Å) | 2.334 | 2.354 | 2.399 | 2.392 |
| d (Cu2-Cu5) (Å) | 2.527 | 2.582 | 2.489 | 2.486 |
| d (Cu6-Cu1) (Å) | 2.423 | 2.478 | 2.423 | 2.431 |
| d (Cu2-O1) (Å)  | 2.003 | 2.005 | 2.010 | 2.016 |
| d (Cu3-O2) (Å)  | 2.051 | 2.167 | 2.199 | 2.094 |
| d (Cu4-O3) (Å)  | 2.010 | 2.004 | 1.980 | 2.014 |
| d (Cu5-O4) (Å)  | 2.012 | 2.023 | 2.012 | 2.028 |

---

**Table S2.** Geometric parameters of C<sub>2</sub>H<sub>5</sub>OH, C<sub>2</sub>H<sub>4</sub>O, and C<sub>2</sub>H<sub>4</sub> species before and after adsorption.

|                                  | Free molecule | Adsorbed Cu <sub>3</sub> /MOR | on Adsorbed Cu <sub>3</sub> O <sub>3</sub> /MOR | on Adsorbed Cu <sub>6</sub> /MOR |
|----------------------------------|---------------|-------------------------------|-------------------------------------------------|----------------------------------|
| C <sub>2</sub> H <sub>5</sub> OH |               |                               |                                                 |                                  |
| d (O-H6) (Å)                     | 0.977         | 0.978                         | 1.000                                           | 0.985                            |
| d (C2-O) (Å)                     | 1.436         | 1.446                         | 1.426                                           | 1.460                            |
| d (C2-H5) (Å)                    | 1.106         | 1.105                         | 1.102                                           | 1.102                            |
| d (C2-H4) (Å)                    | 1.100         | 1.106                         | 1.103                                           | 1.092                            |
| d (C2-C1) (Å)                    | 1.519         | 1.515                         | 1.530                                           | 1.511                            |
| d (C1-H3) (Å)                    | 1.100         | 1.100                         | 1.099                                           | 1.099                            |
| d (C1-H2) (Å)                    | 1.098         | 1.100                         | 1.100                                           | 1.096                            |
| d (C1-H1) (Å)                    | 1.101         | 1.100                         | 1.102                                           | 1.110                            |
| ∠(H6-O-C2) (°)                   | 108.063       | 108.209                       | 110.113                                         | 110.682                          |
| ∠(O-C2-H4) (°)                   | 104.916       | 110.263                       | 106.133                                         | 107.871                          |
| ∠(O-C2-H5) (°)                   | 110.509       | 110.024                       | 110.794                                         | 109.283                          |
| ∠(C1-C2-H4) (°)                  | 110.421       | 110.525                       | 109.285                                         | 111.889                          |
| ∠(C1-C2-H5) (°)                  | 110.487       | 110.483                       | 110.082                                         | 111.344                          |
| ∠(O-C2-C1) (°)                   | 112.934       | 107.583                       | 112.126                                         | 106.333                          |
| ∠(C2-C1-H1) (°)                  | 110.581       | 110.602                       | 110.344                                         | 110.923                          |
| ∠(C2-C1-H2) (°)                  | 110.744       | 110.628                       | 110.425                                         | 110.627                          |
| ∠(C2-C1-H3) (°)                  | 111.137       | 110.562                       | 110.036                                         | 110.411                          |
| C <sub>2</sub> H <sub>4</sub> O  |               |                               |                                                 |                                  |
| d (C2-O) (Å)                     | 1.224         | 1.242                         | 1.246                                           | 1.288                            |
| d (C2-H4) (Å)                    | 1.120         | 1.110                         | 1.110                                           | 1.107                            |
| d (C2-C1) (Å)                    | 1.496         | 1.480                         | 1.472                                           | 1.492                            |
| d (C1-H3) (Å)                    | 1.096         | 1.104                         | 1.102                                           | 1.104                            |
| d (C1-H2) (Å)                    | 1.102         | 1.106                         | 1.096                                           | 1.096                            |
| d (C1-H1) (Å)                    | 1.102         | 1.097                         | 1.110                                           | 1.097                            |
| ∠(O-C2-H4) (°)                   | 120.023       | 116.996                       | 119.338                                         | 118.793                          |

|                                        |         |         |         |         |
|----------------------------------------|---------|---------|---------|---------|
| $\angle(\text{C1-C2-H4})$ ( $^\circ$ ) | 115.320 | 118.351 | 117.280 | 118.169 |
| $\angle(\text{O-C2-C1})$ ( $^\circ$ )  | 124.657 | 124.652 | 123.365 | 121.443 |
| $\angle(\text{C2-C1-H1})$ ( $^\circ$ ) | 109.470 | 109.240 | 109.870 | 107.850 |
| $\angle(\text{C2-C1-H2})$ ( $^\circ$ ) | 109.483 | 109.060 | 111.857 | 111.627 |
| $\angle(\text{C2-C1-H3})$ ( $^\circ$ ) | 111.175 | 111.682 | 107.292 | 110.853 |
| $\text{C}_2\text{H}_4$                 |         |         |         |         |
| d (C1-H1) ( $\text{\AA}$ )             | 1.093   | 1.093   | 1.103   | 1.094   |
| d (C1-H2) ( $\text{\AA}$ )             | 1.093   | 1.093   | 1.098   | 1.092   |
| d (C2-C1) ( $\text{\AA}$ )             | 1.332   | 1.382   | 1.551   | 1.390   |
| d (C2-H3) ( $\text{\AA}$ )             | 1.092   | 1.094   | 1.104   | 1.093   |
| d (C2-H4) ( $\text{\AA}$ )             | 1.092   | 1.092   | 1.100   | 1.091   |
| $\angle(\text{C1-C2-H3})$ ( $^\circ$ ) | 121.591 | 120.966 | 111.809 | 121.029 |
| $\angle(\text{C1-C2-H4})$ ( $^\circ$ ) | 121.737 | 121.300 | 109.422 | 121.105 |
| $\angle(\text{H1-C1-H2})$ ( $^\circ$ ) | 116.501 | 121.277 | 108.590 | 115.905 |
| $\angle(\text{C2-C1-H1})$ ( $^\circ$ ) | 121.700 | 121.277 | 109.932 | 121.053 |
| $\angle(\text{C2-C1-H2})$ ( $^\circ$ ) | 121.800 | 121.021 | 110.643 | 120.900 |
| $\angle(\text{H3-C2-H4})$ ( $^\circ$ ) | 116.672 | 115.887 | 107.846 | 115.856 |

**Table S3** The Bader charges of  $\text{Cu}_3$ ,  $\text{Cu}_3\text{O}_3$  and  $\text{Cu}_6$  in MOR.

|        | $\text{Cu}_3$ | $\text{Cu}_3\text{O}_3$ | $\text{Cu}_6$ |
|--------|---------------|-------------------------|---------------|
| Cu1    | 18.5469       | 17.8486                 | 18.9972       |
| Cu2    | 18.5459       | 17.8856                 | 18.8593       |
| Cu3    | 18.5939       | 17.9294                 | 18.7399       |
| O1/Cu4 | -             | 6.76262                 | 18.6146       |
| O2/Cu5 | -             | 6.71623                 | 18.686        |
| O3/Cu6 | -             | 6.74611                 | 18.6819       |
